# Supplementary material for: A multifunctional phenylalanine additive stabilizing zinc anodes in aqueous zinc ion batteries
Source: Royal Society of Chemistry journal article supplement (doi:10.1039/d3ta06778e), 2024-01-01
Supplement: d3ta06778e1.pdf [file d3ta06778e1.pdf]

## Supporting Information

### Multifunctional phenylalanine additive stabilizing zinc anode in aqueous zinc ion batteries

Gang Ni <sup>\*,a,b</sup>, Zhiqiu Pan <sup>a</sup>, Guoyin Zou <sup>a</sup>, Fuhu Cao <sup>\*,a</sup>, Ling Qin <sup>a</sup>, Chenggang Zhou <sup>c</sup>, Peng Cui <sup>\*,a</sup>

a. School of Chemistry and Chemical Engineering, Hefei University of Technology, Hefei, 230009, Anhui, P. R. China.

b. School of Materials Science and Engineering, Hefei University of Technology, Hefei, 230009, Anhui, P. R. China.

c. Faculty of Materials Science and Chemistry, China University of Geoscience, Wuhan, 430078, Hubei, P. R. China.

\*. Corresponding author, Email address: gangni@hfut.edu.cn, fhcao@hfut.edu.cn, cuipeng@hfut.edu.cn

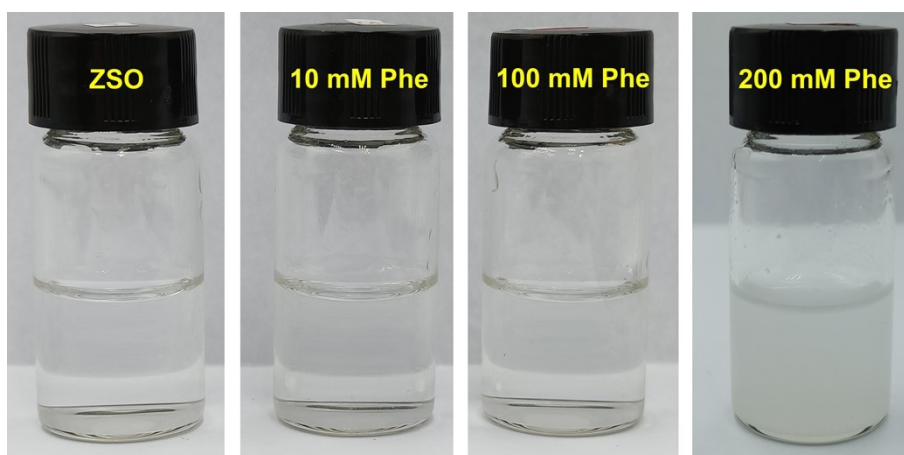

Figure S1. Photographs of ZSO and Phe electrolytes

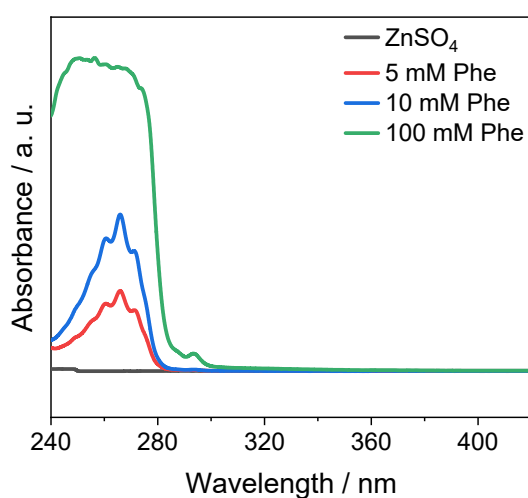

Figure S2. UV-vis spectra of ZSO and Phe electrolytes

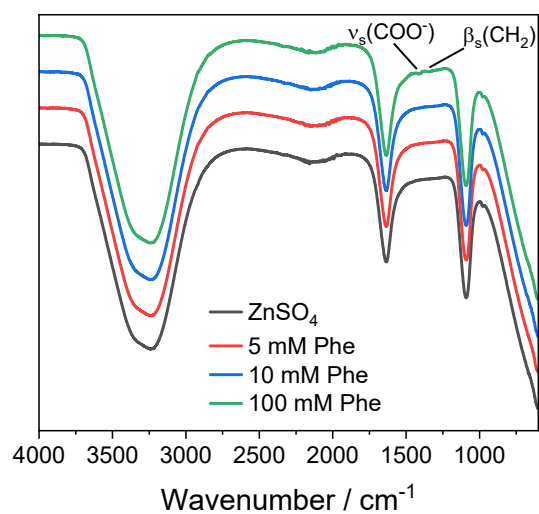

Figure S3. FT-IR spectra of ZSO and Phe electrolytes

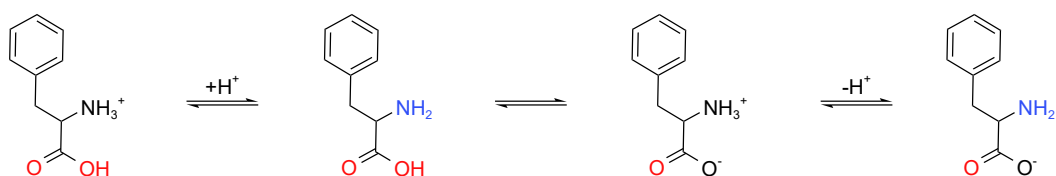

Figure S4. Acid-base equilibria of Phe

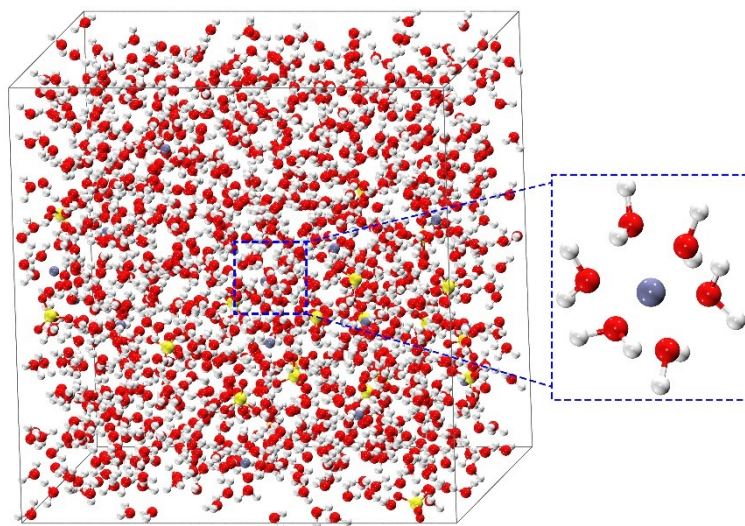

Figure S5. MD snapshot of 1 M ZSO electrolyte and the amplified view of Zn<sup>2+</sup> solvation structure

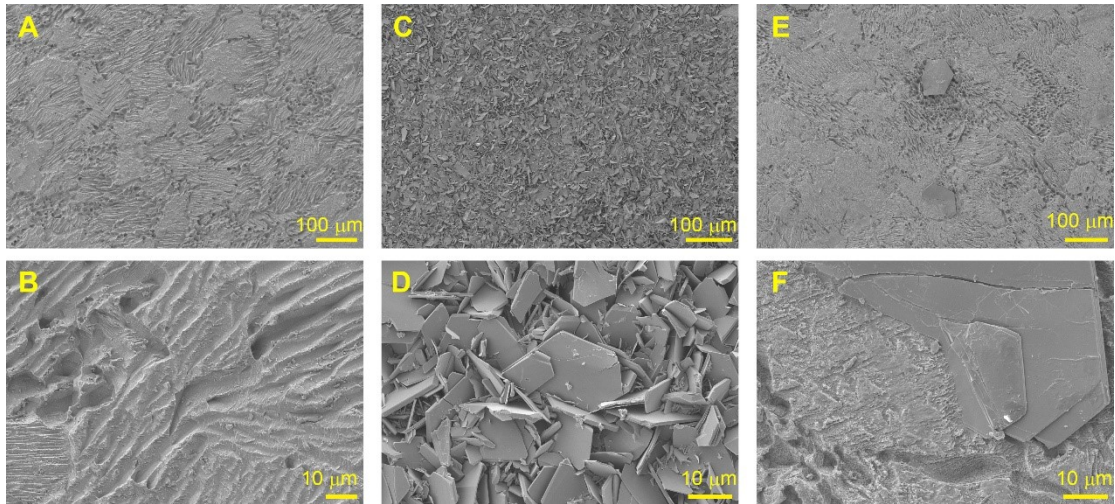

Figure S6. SEM images of (A-B) pre-treated Zn anodes and these anodes after immersed in (C-D) ZSO and (E-F) Phe electrolytes for 5 days

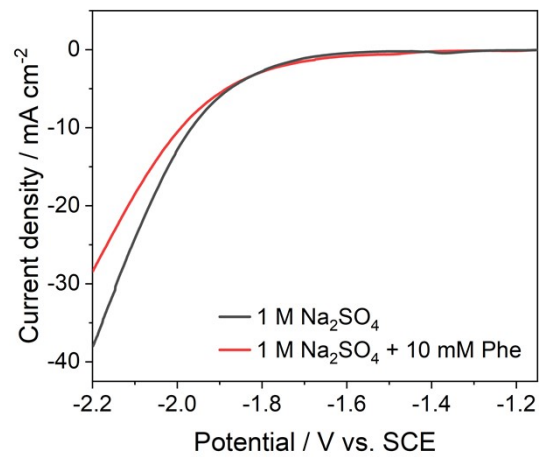

Figure S7. The linear polarization curves of Zn electrodes in 1 M Na<sub>2</sub>SO<sub>4</sub> solution with the absence and presence of 10 mM Phe

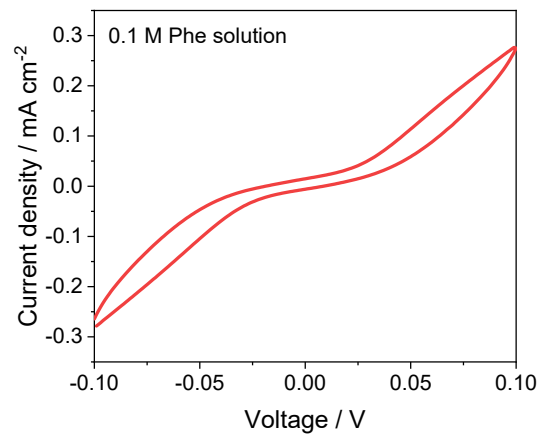

Figure S8. CV curve of pure Phe electrolyte in Zn/Zn symmetric battery

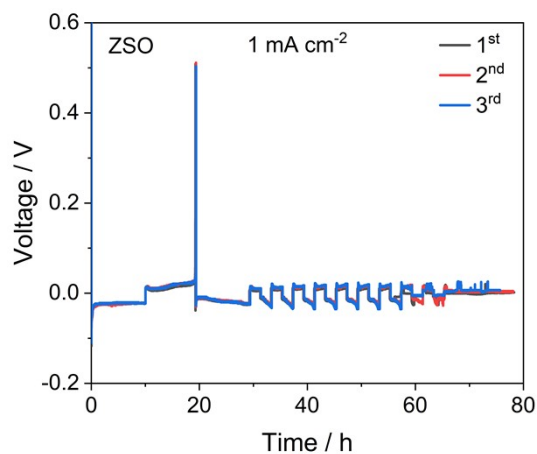

Figure S9. Galvanostatic measurements of Cu/Zn cell with the ZSO electrolyte

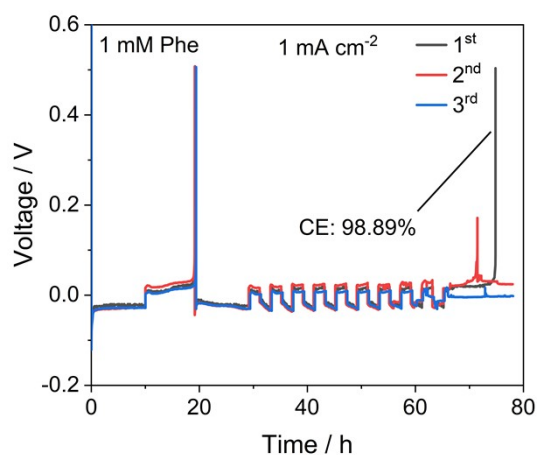

Figure S10. Galvanostatic measurements of Cu/Zn cell with the 1 mM Phe electrolyte

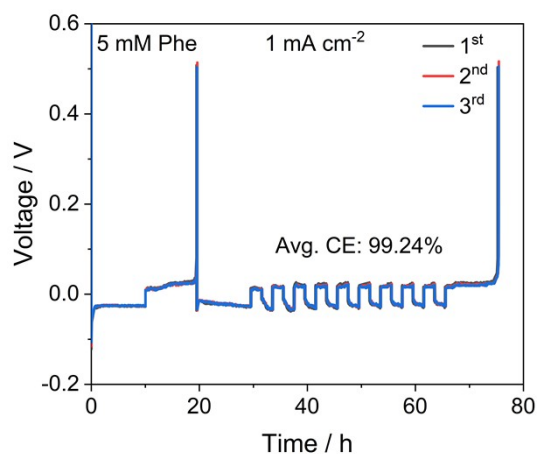

Figure S11. Galvanostatic measurements of Cu/Zn cell with the 5 mM Phe electrolyte

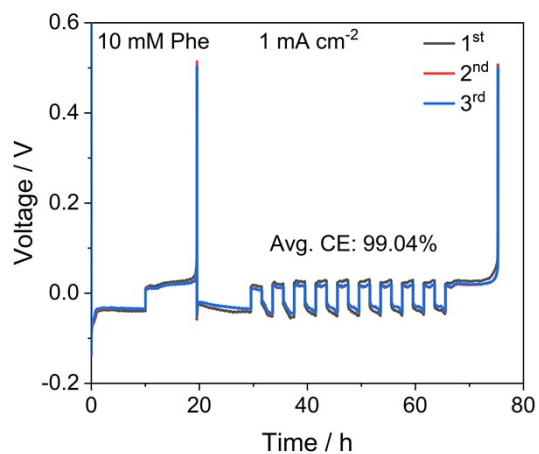

Figure S12. Galvanostatic measurements of Cu/Zn cell with the 10 mM Phe electrolyte

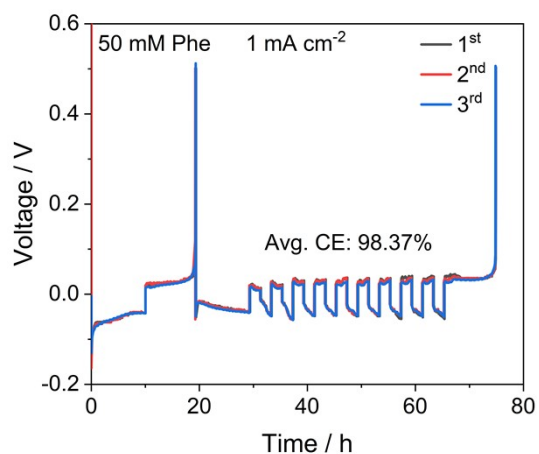

Figure S13. Galvanostatic measurements of Cu/Zn cell with the 50 mM Phe electrolyte

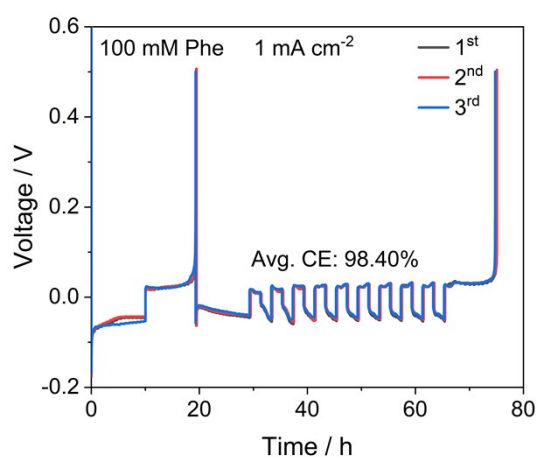

Figure S14. Galvanostatic measurements of Cu/Zn cell with the 100 mM Phe electrolyte

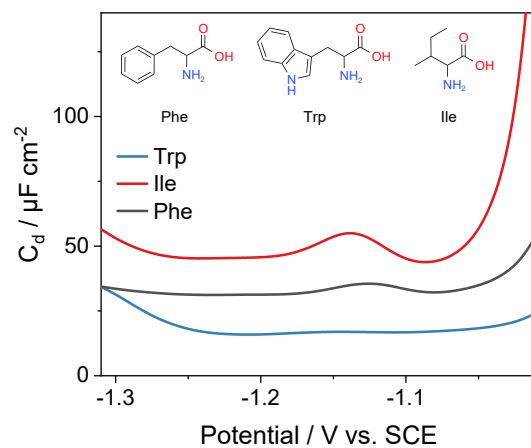

Figure S15. Differential capacitance of Zn anode in  $\text{Na}_2\text{SO}_4$  electrolyte with 10 mM different additives

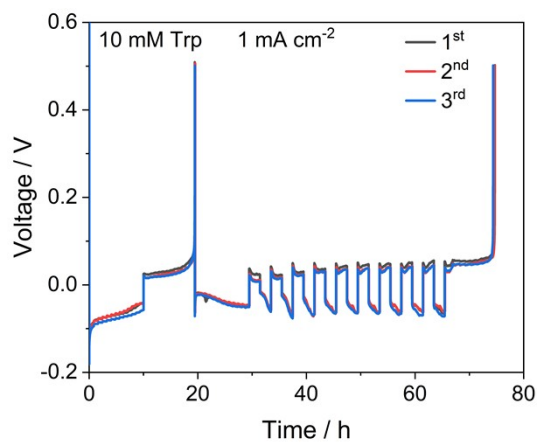

Figure S16. Galvanostatic measurements of Cu/Zn cell with the 10 mM Trp electrolyte

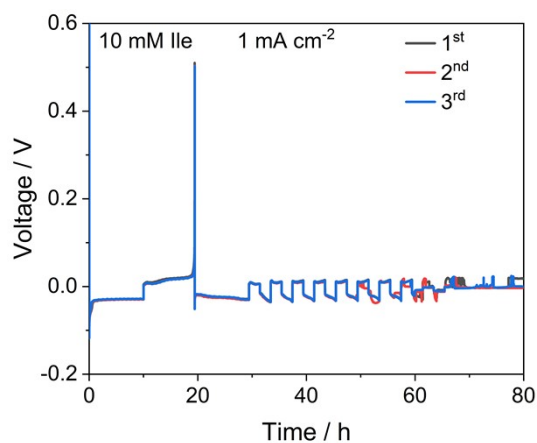

Figure S17. Galvanostatic measurements of Cu/Zn cell with the 10 mM Ile electrolyte

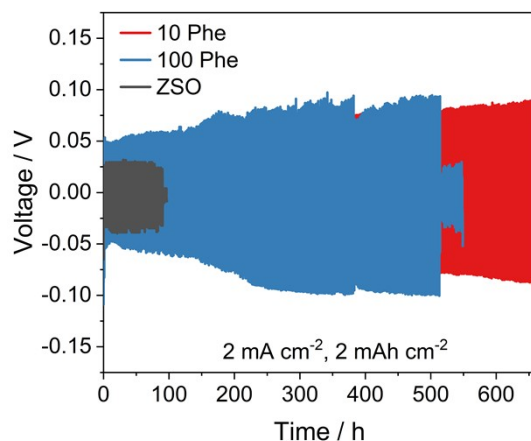

Figure S18. Galvanostatic cycling of Zn/Zn cell with different electrolytes at  $2 \text{ mA} \cdot \text{cm}^{-2}$  and  $2 \text{ mAh} \cdot \text{cm}^{-2}$

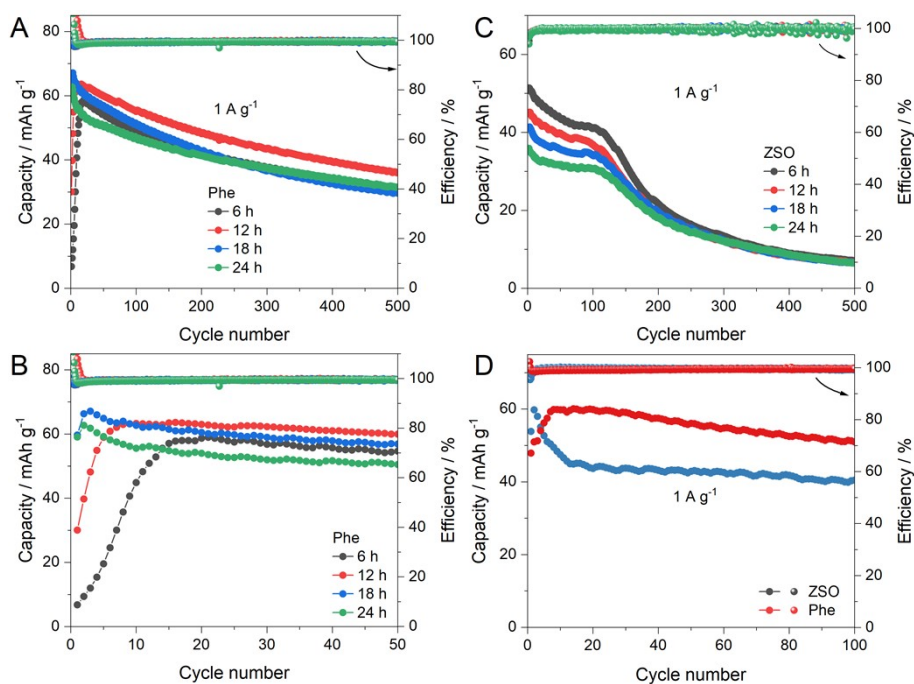

Figure S19. (A-C) Cycle performance of the ZnHCF/Zn full cells with (A-B) Phe and (C) ZSO electrolytes after different relax timescale; (B) the enlarged view of (A); (D) cycle performance of full cells using commercial separators (NKK, MPF-30AC)
